# Supplementary material
Source: PubMed Central journal article supplement (PMC8282758)
Supplement: NIHMS1701135-supplement-figS1-S11.pdf [file NIHMS1701135-supplement-figS1-S11.pdf]

## **New Phytologist Supporting Information**

Article title: Aldoximes are precursors of auxins in Arabidopsis and maize

Authors: Veronica C. Perez<sup>1</sup>, Ru Dai<sup>1</sup>, Bing Bai<sup>1</sup>, Breanna Tomiczek<sup>2</sup>, Bryce C. Askey<sup>1</sup>, Yi Zhang<sup>4</sup>, **Garret M. Rubin<sup>4</sup>**, Yousong Ding<sup>4</sup>, Alexander Grenning<sup>2</sup>, Anna K. Block<sup>3</sup>, and Jeongim Kim<sup>1,5</sup>

Article acceptance date: 28 April 2021

The following Supporting Information is available for this article:

**Fig. S1** Expression profile of *CYP79A2* in *Arabidopsis thaliana*.

**Fig. S2** LC-MS confirmation of the identity of an unknown peak as benzyl glucosinolate.

**Fig. S3** Mass spectra of D<sub>5</sub>-PAA in D<sub>5</sub>-PAOx fed *sur1* samples

**Fig. S4** Overexpression of *ZmCYP79A61* in *Arabidopsis* increases free IAA and PAA content.

**Fig. S5** Morphology and auxin content of wild type and *yuc6-1D*

**Fig. S6** Mass spectra of D<sub>5</sub>-PAA in D<sub>5</sub>-PAOx fed maize samples

**Fig. S7** Mass spectra of D<sub>5</sub>-IAA in D<sub>5</sub>-IAOx fed maize samples

**Fig. S8** The expression of the genes functioning in glucosinolates biosynthesis in *ox-2* compared to wild type.

**Fig. S9** Indole glucosinolate content in *CYP79A2* overexpression lines

**Fig. S10** Root phenotype of *CYP79A2* overexpression lines

**Fig. S11** Expression profile of *CYP79A61* (GRMZM2G138248) homologs in *Zea mays*.

**Table S1** Primers used in this study.

**Table S2** GO term analysis of the genes that are up-regulated in *CYP79A2* overexpression line *ox-2* compared to wild type.

**Table S3** GO term analysis of the genes that are down-regulated in *CYP79A2* overexpression line *ox-2* compared to wild type.

**Table S4** A full list of genes that are up-regulated in CYP79A2 overexpression line *ox-2*, *ref2-1*, and *ref5-1* (p-value < 0.05 for all genotypes).

**Table S5** A full list of genes that are down-regulated in CYP79A2 overexpression line *ox-2*, *ref2-1*, and *ref5-1* (p-value < 0.05 for all genotypes). .

**Table S6** GO term analysis of the genes that are up-regulated in CYP79A2 overexpression line *ox-2*, *ref2*, and *ref5* compared to wild type.

**A**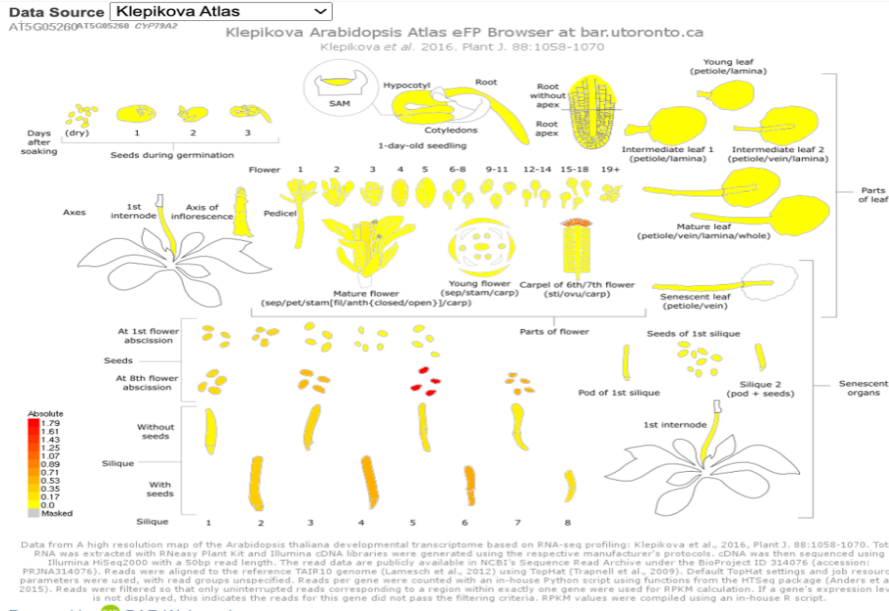**B**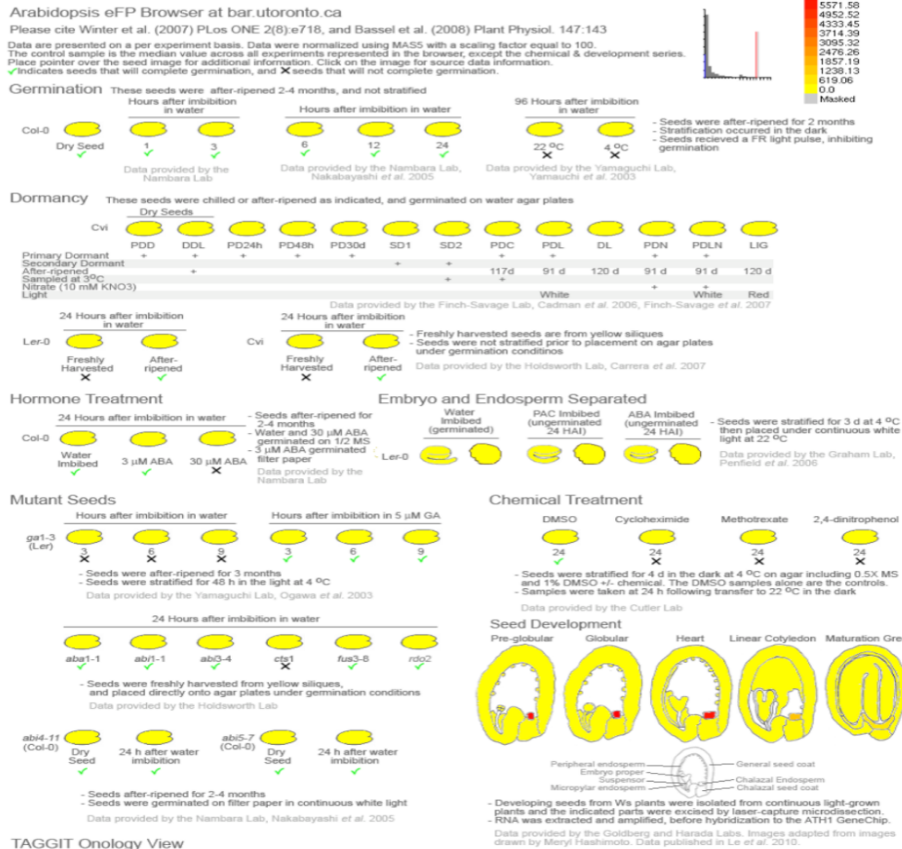

**Fig. S1 . Expression profile of CYP79A2 in Arabidopsis thaliana. A) Whole-plant expression profile. B) Seed-specific expression profile. Images from TAIR.**

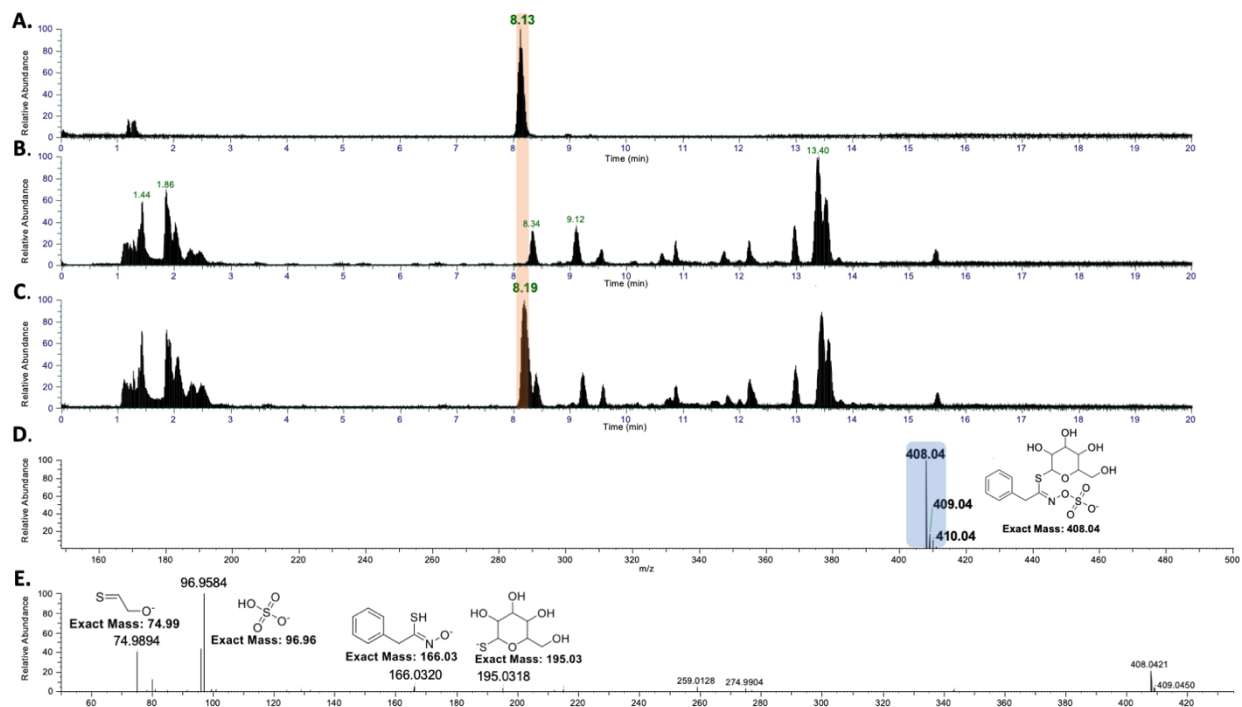

**Fig. S2 .** LC-MS confirmation of the identity of an unknown peak as benzyl glucosinolate. A) MS trace of benzyl glucosinolate standard. B-C) TIC of WT (B) and the *CYP79A2* overexpression line (C) showing an unknown peak in *CYP79A2* overexpression plants that is absent in wild-type plants. D-E) MS spectrum (D) and MS/MS fragmentation pattern (E) of benzyl glucosinolate in the *CYP79A2* overexpression line. LC/MS analysis suggests that the peak is benzyl glucosinolate.

**A****Precursor Ion Spectrum**

Averaged Spectrum - Q3MS [89.990-189.990] Max Intensity: 1.10E+005

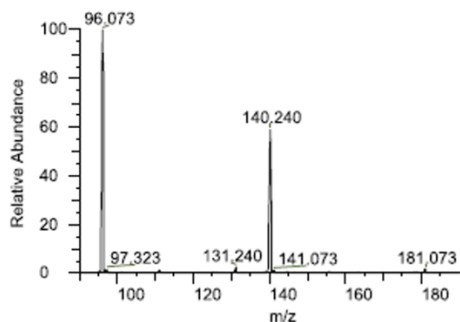**Product Spectrum**

Averaged Spectrum - Full MS2 Max Intensity: 9.00E+003

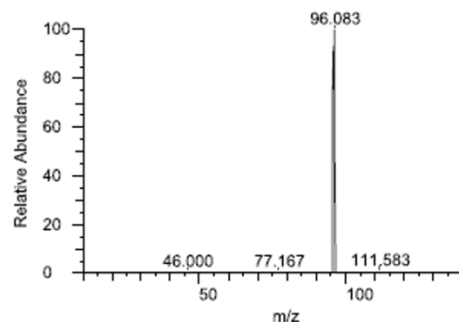**B**

136 #188 RT: 2.02 AV: 1 NL: 4.15E5

F: - c ESI SRM ms2 140.077 [80.082-80.084, 95.999-96.001, 111.749-111.751]

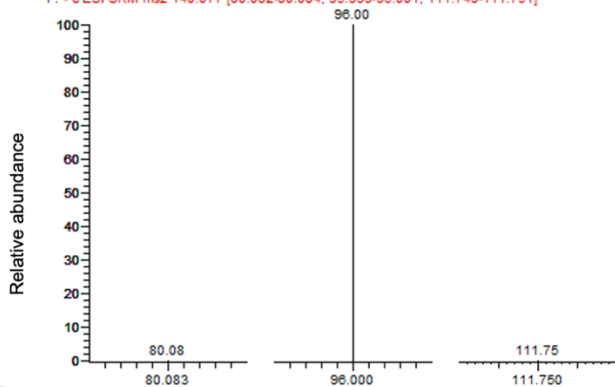**C**

125 #200 RT: 2.05 AV: 1 NL: 5.97E4

F: - c ESI SRM ms2 140.077 [80.082-80.084, 95.999-96.001, 111.749-111.751]

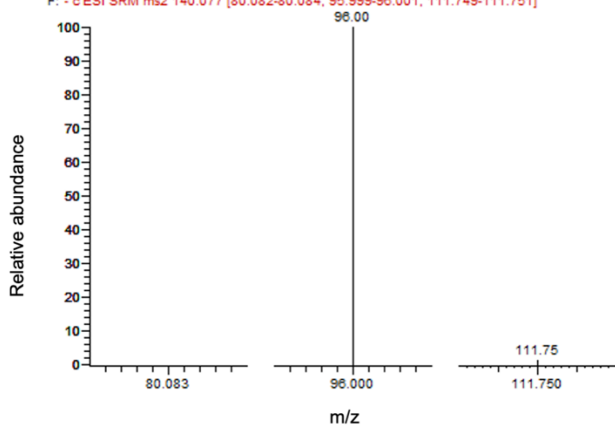

**Fig. S3 .** Mass spectra of D<sub>5</sub>-PAA and D<sub>5</sub>-PAOx fed *sur1* samples. A) Precursor ion spectrum and product spectrum of D<sub>5</sub>-PAA analyzed with direct infusion MS. B-C) Mass fragmentation pattern of *sur1* fed with D<sub>5</sub>-PAA (B) or D<sub>5</sub>-PAA standard (C). Parent ion → product ion (m/z 140.077 → 96) was monitored for D<sub>5</sub>-PAA.

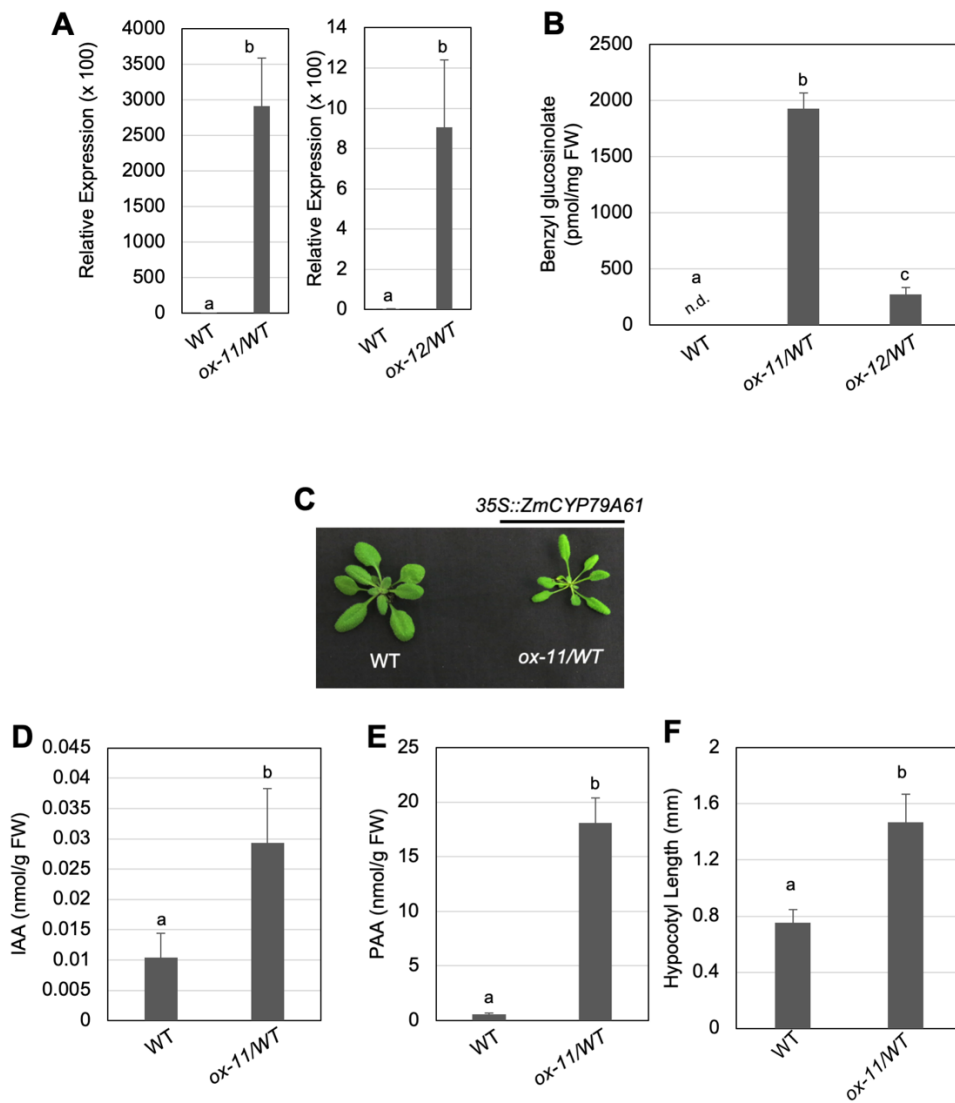

**Fig. S4 .** Overexpression of *ZmCYP79A61* in *Arabidopsis* increases free IAA and PAA content. A) Relative expression of *ZmCYP79A61* in wild type, and *ZmCYP79A61* overexpression lines (*ox-11/WT*, *ox-12/WT*). (N=3). B) Benzyl glucosinolate contents in 2-week-old wild type, and *ZmCYP79A61* overexpression line (*ox-11/WT*, *ox-12/WT*). C) Representative 3-week-old wild type, and the strong *ZmCYP79A61* overexpression line (*ox-11/WT*). D and E) Free IAA (D) and free PAA (E) content of 2-week-old wild type, and *ZmCYP79A61* overexpression line (*ox-11/WT*) (N=3). (F) Hypocotyl length of 2-week-old wild type and *ZmCYP79A61* overexpression line (*ox-11/WT*) (N=6). Data represent mean  $\pm$  SD. The means were compared by one-way ANOVA, and statistically significant differences ( $P < 0.05$ ) were identified by Tukey's test and indicated by letters to represent difference among groups.

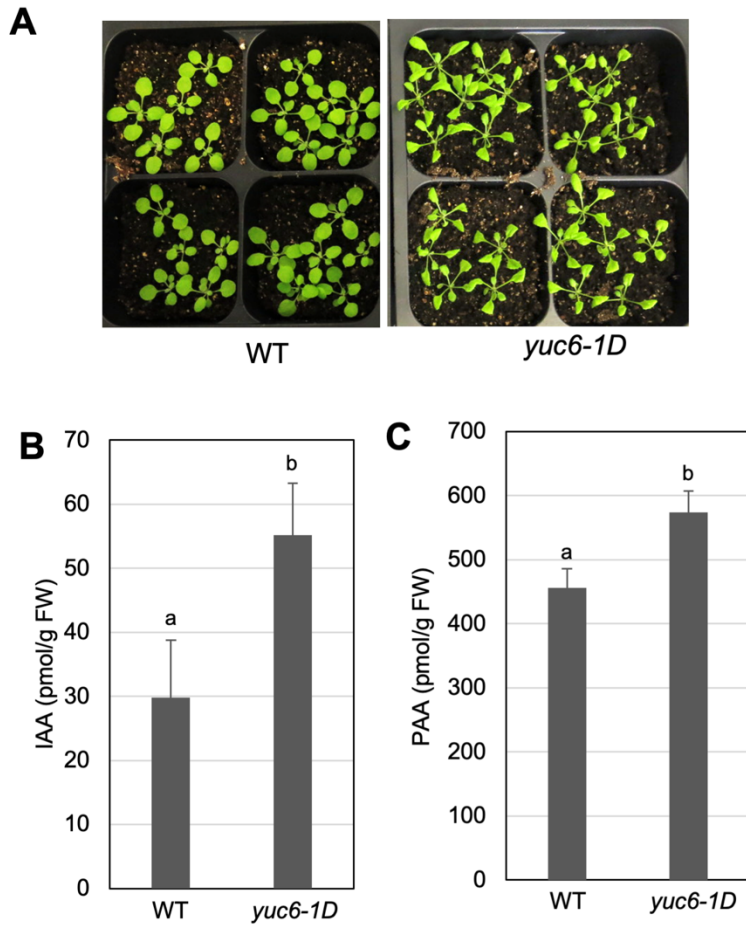

**Fig. S5 .** Morphology and auxin content of wild type and *yuc6-1D*. Related to Figure 1. A) Representative 3-week-old wild type and *yuc6-1D* plants. B, C) Free IAA and PAA content of 2-week-old wild type and *yuc6-1D* plants (N=3). Data represent mean  $\pm$  SD. The means were compared by one-way ANOVA, and statistically significant differences ( $P < 0.05$ ) were identified by Tukey's test and indicated by letters to represent difference between groups.

**A****Precursor Ion Spectrum**

Averaged Spectrum - Q3MS [89.990-189.990] Max Intensity: 1.10E+005

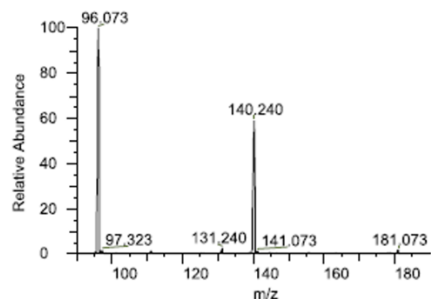**Product Spectrum**

Averaged Spectrum - Full MS2 Max Intensity: 9.00E+003

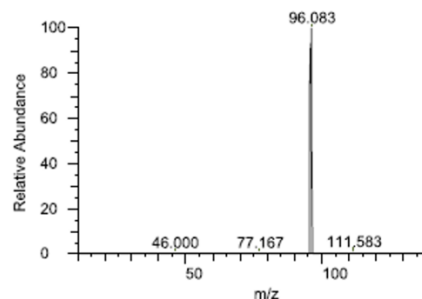

152 #182 RT: 2.00 AV: 1 NL: 6.92E3  
F: -c ESI SRM ms2 140.077 [80.082-80.084, 95.999-96.001, 111.749-111.751]

**B**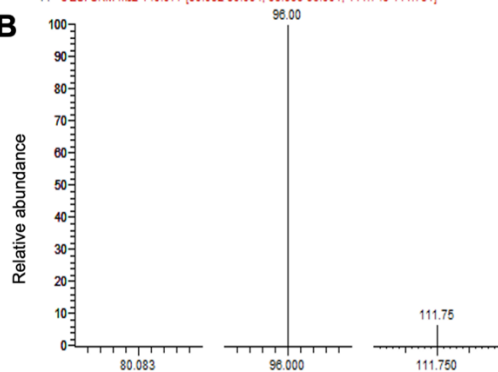**C**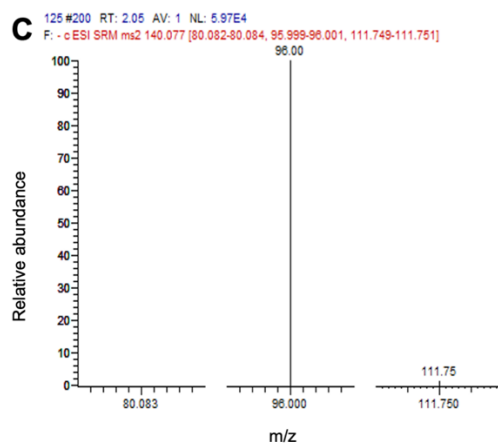

**Fig. S6 .** Mass spectra of D<sub>5</sub>-PAA and D<sub>5</sub>-PAOx fed maize samples. A) Precursor ion spectrum and product spectrum of D<sub>5</sub>-PAA analyzed with direct infusion MS. B-C) Mass fragmentation pattern of maize fed with D<sub>5</sub>-PAA (B) or D<sub>5</sub>-PAA standard (C). Parent ion → product ion (m/z 140.077 → 96) was monitored for D<sub>5</sub>-PAA.



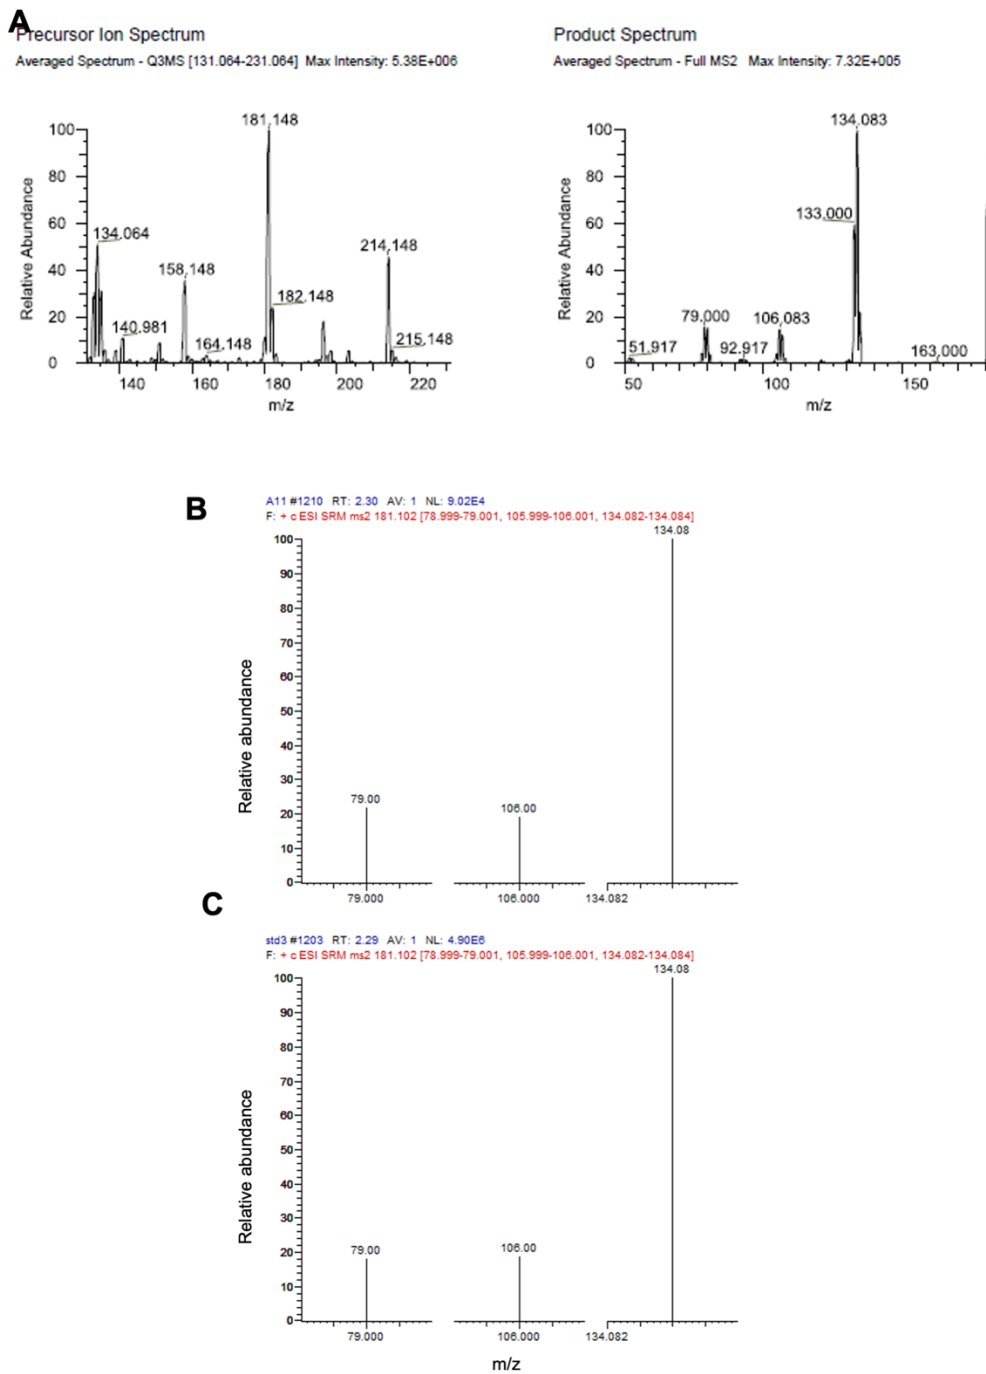

**Fig. S7 .** Mass spectra of D<sub>5</sub>-IAA and D<sub>5</sub>-IAOx fed maize samples. A) Precursor ion spectrum and product spectrum of D<sub>5</sub>-IAA analyzed with direct infusion MS. B-C) Mass fragmentation pattern of maize fed with D<sub>5</sub>-IAA (B) or D<sub>5</sub>-IAA standard (C). Parent ion→ product ion (m/z 181.102→ 134.083) was monitored for D<sub>5</sub>-IAA.

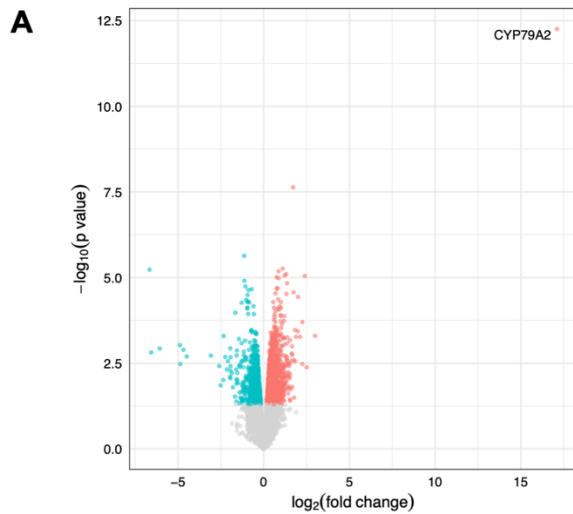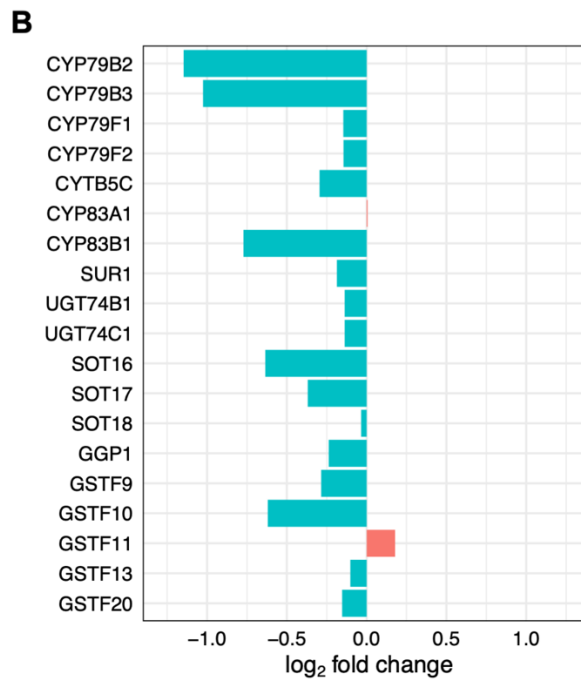

**Fig. S8 .** The expression of the genes functioning in glucosinolates biosynthesis in *ox-2* compared to wild type. (A) A volcano plot showing p-values and  $\log_2(\text{fold change})$  of genes identified from RNAseq analysis. The blue or red colored points represent genes that showed a p-value  $< 0.05$ . (B) A heatmap showing expression levels of glucosinolate biosynthesis genes in *CYP79A2* overexpression line *ox-2* compared to wild type.

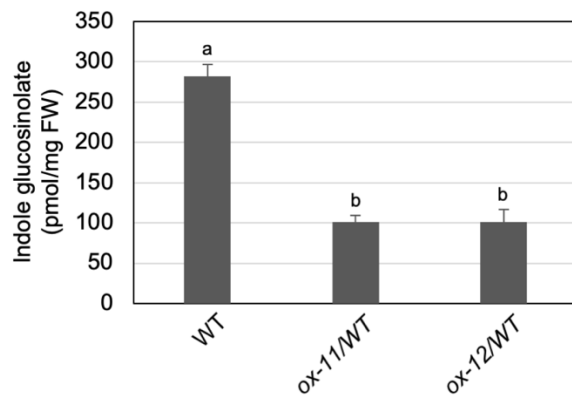

**Fig. S9** . Indole glucosinolate content in *CYP79A2* overexpression lines. 2-week-old whole aerial parts were extracted to measure relative amount of benzyl glucosinolate. Data represent mean  $\pm$  SD (N=4). The means were compared by one-way ANOVA, and statistically significant differences ( $P < 0.05$ ) were identified by Tukey's test and indicated by letters to represent difference among groups.

**A GRMZM2G138248 (CYP79A61)**

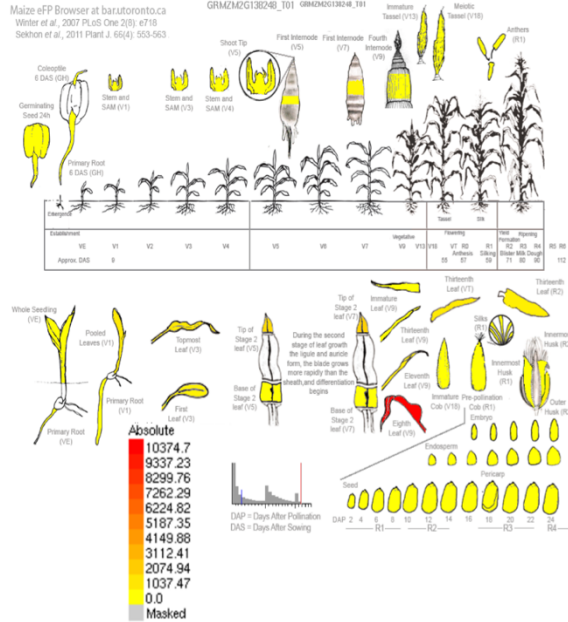

**B GRMZM2G105185**

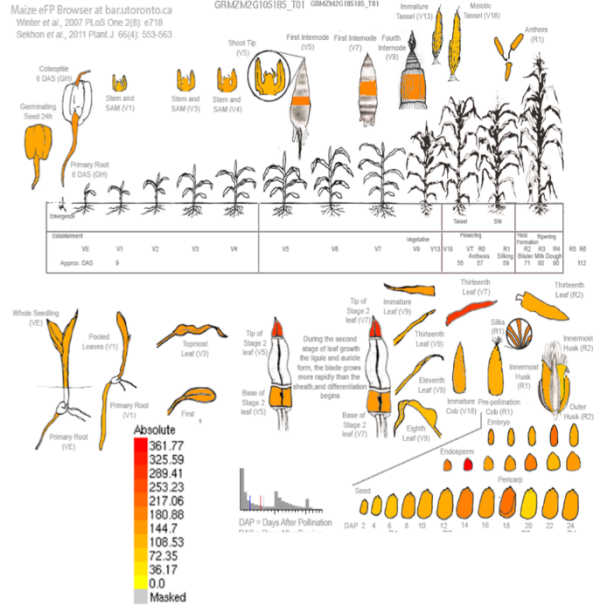

**C GRMZM2G178351**

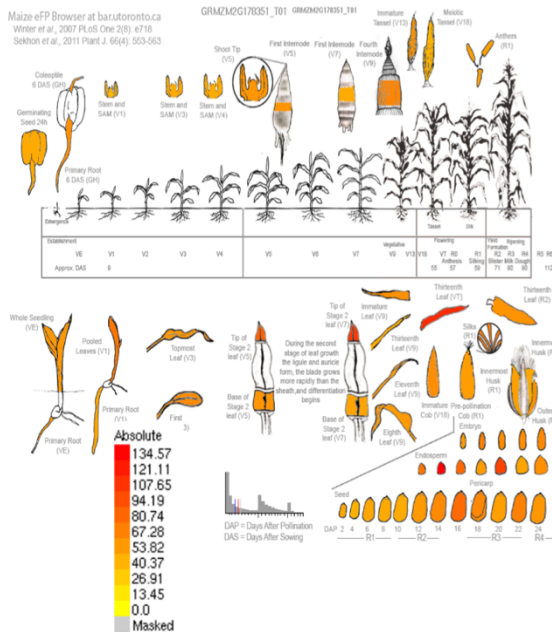

**D GRMZM2G011156**

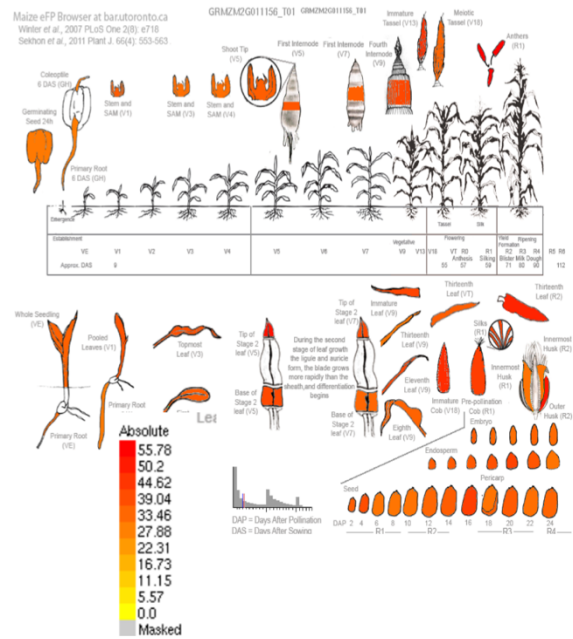

**Fig. S10 .** Expression profile of CYP79A61 (GRMZM2G138248) homologs in *Zea mays*. The expression data were extracted from Maize eFP Browser at bar.utoronto.ca. Tissue-specific expression patterns of CYP79A61 (A), GRMZM2G105185 (B), GRMZM2G178351 (C), and GRMZM2G011156 (D) are shown.

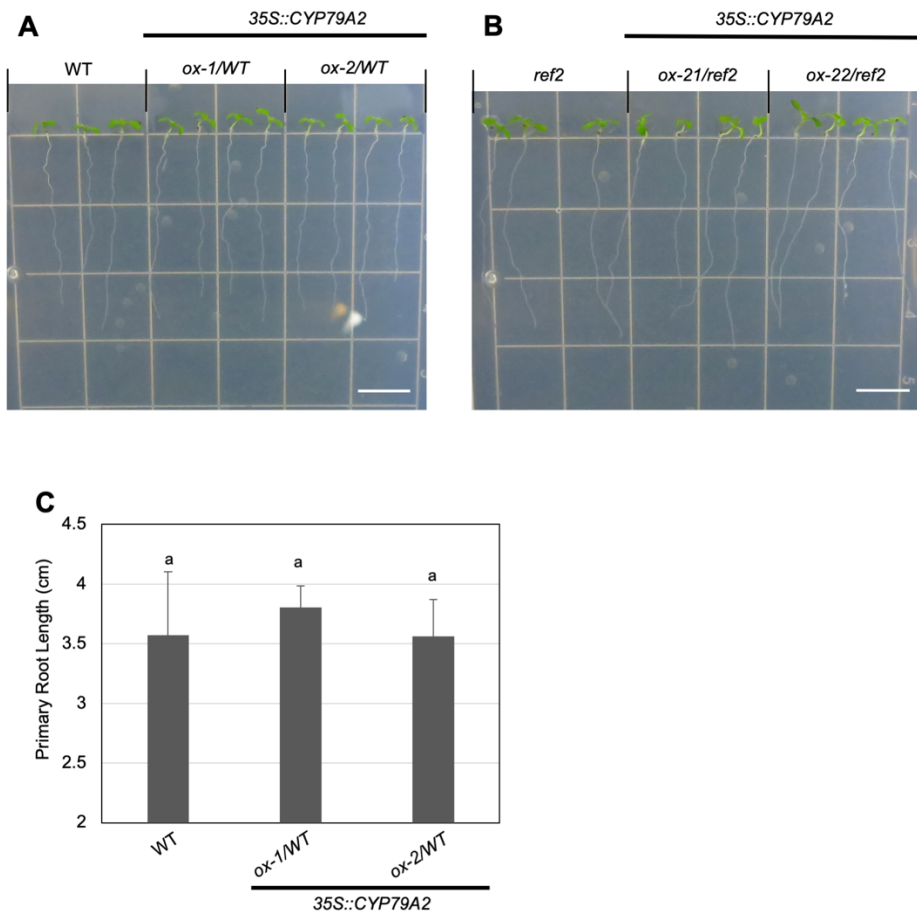

**Fig. S11** . Root phenotype of *CYP79A2* overexpression lines. Related to Figure 1. A,B) Representative 8-day-old *CYP79A2* overexpression lines compared with their controls. C) Main or primary root length of 10-day-old wild type and *CYP79A2* overexpression lines *ox-1* and *ox-2* (N=20). Data represent mean  $\pm$  SD. The means were compared by one-way ANOVA, and statistically significant differences ( $P < 0.05$ ) were identified by Tukey's test and indicated by letters to represent difference among groups. Scale bar indicates 1 cm.

**Table S1** Primers used in this study.

| Primer name        | Sequences (5' to 3')     |
|--------------------|--------------------------|
| CYP79A2-Forward    | GGGAGAAATCCTAGTGTGTGG    |
| CYP79A2-Reverse    | GTAACATGTACGTCATGGCTGAC  |
| ZmCYP79A61-Forward | CACTACTGCGGGAATGTCGT     |
| ZmCYP79A61-Reverse | AGTAGAGAAGGCCGAGGGAG     |
| Tubulin 3-Forward  | TGGTGGAGCCTTACAACGCTACTT |
| Tubulin 3-Reverse  | TTCACAGCAAGCTTACGGAGGTCA |
| KFB1-Forward       | TGGTGTATGACGTGGCAGAAGACA |
| KFB1-Reverse       | ACCGATGACATGGAATTTGCCAGC |
| KFB20-Forward      | AGCTTCCTCCGATTCTGGTCAA   |
| KFB20-Reverse      | CACGCGCCATTTGGAAGTGAGAAA |
| KFB39-Forward      | AGACGAATGTCAAGGATTCGCCGT |
| KFB39-Reverse      | ACCATGAATCTGTCGCTGGATCGT |
| KFB50-Forward      | GCGTTTATAACGCAACGCTGGACA |
| KFB50-Reverse      | TCTCCGGCGAAGAAATCCAGAACA |
| P367               | CGAATTTTCATCGTAATCGG     |
| P368               | TTCGATACCTTCAAGATCAAT    |

**Table S2** GO term analysis of the genes that are up-regulated in CYP79A2 overexpression line ox-2 compared to wild type.

| GO Term    | Description                          | Count <sup>a</sup> | Fold Enrichment <sup>b,c</sup> | FDR        |
|------------|--------------------------------------|--------------------|--------------------------------|------------|
| GO:0009631 | cold acclimation                     | 14                 | 5.705794228                    | 1.34E-04   |
| GO:0007623 | circadian rhythm                     | 17                 | 3.64280088                     | 0.00267338 |
| GO:0009414 | response to water deprivation        | 38                 | 2.830985462                    | 2.00E-05   |
| GO:0042254 | ribosome biogenesis                  | 19                 | 2.781144168                    | 0.01843619 |
| GO:0009409 | response to cold                     | 39                 | 2.711138251                    | 2.05E-05   |
| GO:0009873 | ethylene-activated signaling pathway | 22                 | 2.554629339                    | 0.01843619 |
| GO:0009734 | auxin-activated signaling pathway    | 23                 | 2.516126552                    | 0.01843619 |
| GO:0009737 | response to abscisic acid            | 45                 | 2.373966235                    | 5.50E-05   |
| GO:0016567 | protein ubiquitination               | 41                 | 1.868862113                    | 0.01902625 |

a. 'Count' represents the number of genes that were used as queries and related to the specific GO term.

b. 'Fold Enrichment' was normalized to the percentage of background genes (all expressed genes) involved in the corresponding GO term.

c. GO terms organized from largest to smallest fold enrichment.

**Table S3** GO term analysis of the genes that are down-regulated in CYP79A2 overexpression line ox-2 compared to wild type.

| GO Term    | Description                                                                              | Count | Fold Enrichment | FDR        |
|------------|------------------------------------------------------------------------------------------|-------|-----------------|------------|
| GO:0051131 | chaperone-mediated protein complex assembly                                              | 7     | 15.05382469     | 6.72E-04   |
| GO:0030490 | maturation of SSU-rRNA                                                                   | 6     | 9.462404092     | 3.29E-02   |
| GO:0000462 | maturation of SSU-rRNA from tricistronic rRNA transcript (SSU-rRNA, 5.8S rRNA, LSU-rRNA) | 14    | 8.07766203      | 6.80E-06   |
| GO:0000162 | tryptophan biosynthetic process                                                          | 8     | 7.278772379     | 1.02E-02   |
| GO:0009695 | jasmonic acid biosynthetic process                                                       | 7     | 6.623682864     | 4.65E-02   |
| GO:0010584 | pollen exine formation                                                                   | 7     | 5.914002558     | 8.07E-02   |
| GO:0042335 | cuticle development                                                                      | 7     | 5.710071435     | 0.08850562 |
| GO:0008652 | cellular amino acid biosynthetic process                                                 | 14    | 4.799770192     | 1.25E-03   |
| GO:0006364 | rRNA processing                                                                          | 14    | 4.301092769     | 3.48E-03   |
| GO:0009553 | embryo sac development                                                                   | 10    | 3.240549347     | 1.91E-01   |
| GO:0009611 | response to wounding                                                                     | 27    | 3.209609428     | 1.48E-04   |
| GO:0009617 | response to bacterium                                                                    | 13    | 3.014981696     | 8.85E-02   |
| GO:0009408 | response to heat                                                                         | 20    | 2.957001279     | 7.32E-03   |
| GO:0006633 | fatty acid biosynthetic process                                                          | 16    | 2.957001279     | 3.45E-02   |
| GO:0080167 | response to karrikin                                                                     | 14    | 2.587376119     | 1.75E-01   |



**Table S4** A full list of genes that are up-regulated in CYP79A2 overexpression line ox-2, ref2-1, and ref5-1 (p-value < 0.05 for all genotypes).

| AGI Number | Name      | Short Description                                             |
|------------|-----------|---------------------------------------------------------------|
| AT3G49580  | LSU1      | response to low sulfur 1                                      |
| AT1G09080  | BIP3      | heat shock protein 70 (Hsp 70) family protein                 |
| AT2G04050  | AT2G04050 | MATE efflux family protein                                    |
| AT4G12470  | AZI1      | azelaic acid induced 1                                        |
| AT4G14690  | ELIP2     | chlorophyll A-B binding family protein                        |
| AT4G05070  | WIP2      | wound-responsive family protein                               |
| AT2G21660  | GRP7      | cold, circadian rhythm, and RNA binding 2                     |
| AT2G27830  | AT2G27830 | hypothetical protein                                          |
| AT5G24470  | PRR5      | two-component response regulator-like protein                 |
| AT3G59940  | KFB50     | galactose oxidase/kelch repeat superfamily protein            |
| AT1G80440  | KFB20     | galactose oxidase/kelch repeat superfamily protein            |
| AT1G05680  | UGT74E2   | uridine diphosphate glycosyltransferase 74E2                  |
| ATMG00660  | ORF149    | hypothetical protein                                          |
| AT5G10140  | FLC       | K-box region and MADS-box transcription factor family protein |
| AT3G54990  | SMZ       | integrase-type DNA-binding superfamily protein                |
| AT5G54490  | PBP1      | pinoid-binding protein 1                                      |
| AT3G55580  | TCF1      | regulator of chromosome condensation (RCC1) family protein    |
| AT3G49570  | LSU3      | response to low sulfur 3                                      |
| AT3G62960  | ROXY8     | thioredoxin superfamily protein                               |
| AT2G24550  | AT2G24550 | major centromere autoantigen B-like protein                   |
| AT1G21520  | AT1G21520 | hypothetical protein                                          |
| AT1G76530  | PILS4     | auxin efflux carrier family protein                           |
| AT2G05380  | GRP3S     | glycine-rich protein 3 short isoform                          |
| AT1G13670  | AT1G13670 | hypothetical protein                                          |
| AT2G18690  | AT2G18690 | transmembrane protein                                         |
| AT3G14210  | ESM1      | GDSL-like lipase/acylhydrolase superfamily protein            |
| AT4G03510  | RMA1      | RING membrane-anchor 1                                        |
| AT5G43260  | AT5G43260 | chaperone protein dnaJ-like protein                           |
| AT4G27657  | AT4G27657 | hypothetical protein                                          |
| AT3G03990  | D14       | alpha/beta-Hydrolases superfamily protein                     |
| AT5G23020  | IMS2      | 2-isopropylmalate synthase 2                                  |
| AT3G62550  | AT3G62550 | adenine nucleotide alpha hydrolases-like superfamily protein  |
| AT4G36040  | J11       | chaperone DnaJ-domain superfamily protein                     |
| AT1G76930  | EXT4      | extensin 4                                                    |
| AT3G15760  | AT3G15760 | cytochrome P450 family protein                                |
| AT4G37370  | CYP81D8   | cytochrome P450, family 81, subfamily D, polypeptide 8        |
| AT5G46710  | AT5G46710 | PLATZ transcription factor family protein                     |
| AT4G01670  | AT4G01670 | hypothetical protein                                          |

|           |           |                                                                   |
|-----------|-----------|-------------------------------------------------------------------|
| AT2G28900 | OEP16-1   | outer plastid envelope protein 16-1                               |
| AT1G78000 | SULTR1;2  | sulfate transporter 1                                             |
| AT5G66010 | AT5G66010 | RNA-binding (RRM/RBD/RNP motifs) family protein                   |
| AT4G34138 | UGT73B1   | UDP-glucosyl transferase 73B1                                     |
| AT2G40520 | AT2G40520 | nucleotidyltransferase family protein                             |
| AT4G34750 | SAUR49    | SAUR-like auxin-responsive protein family                         |
| AT4G17940 | AT4G17940 | tetratricopeptide repeat (TPR)-like superfamily protein           |
| AT1G32450 | NRT1.5    | nitrate transporter 1.5                                           |
| AT3G22120 | CWLP      | cell wall-plasma membrane linker protein                          |
| AT3G23870 | DUF803    | protein of unknown function                                       |
| AT2G30230 | AT2G30230 | 6,7-dimethyl-8-ribityllumazine synthase                           |
| AT2G23170 | GH3.3     | auxin-responsive GH3 family protein                               |
| AT3G13310 | DJC66     | chaperone DnaJ-domain superfamily protein                         |
| AT4G29190 | OZF2      | zinc finger C-x8-C-x5-C-x3-H type family protein                  |
| AT4G04330 | RbcX1     | chaperonin-like RbcX protein                                      |
| AT2G36800 | DOGT1     | don-glucosyltransferase 1                                         |
| AT4G27740 | AT4G27740 | Yippee family putative zinc-binding protein                       |
| AT2G43540 | AT2G43540 | transmembrane protein                                             |
| AT1G17860 | AtKTI5    | Kunitz family trypsin and protease inhibitor protein              |
| AT2G44130 | KFB39     | galactose oxidase/kelch repeat superfamily protein                |
| AT1G73500 | MKK9      | MAP kinase kinase 9                                               |
| AT1G07420 | SMO2-1    | sterol 4-alpha-methyl-oxidase 2-1                                 |
| AT1G56300 | AT1G56300 | chaperone DnaJ-domain superfamily protein                         |
| AT1G78380 | GSTU19    | glutathione S-transferase TAU 19                                  |
| AT2G47000 | ABCB4     | ATP binding cassette subfamily B4                                 |
| AT3G53990 | AtUSP     | Adenine nucleotide alpha hydrolases-like superfamily protein      |
| AT2G02410 | AT2G02410 | yacP-like NYN domain protein                                      |
| AT5G40720 | AT5G40720 | C3H4 type zinc finger protein                                     |
| AT1G70420 | DUF1645   | DNA ligase-like protein, putative                                 |
| AT1G49650 | AT1G49650 | alpha/beta-Hydrolases superfamily protein                         |
| AT4G17900 | AT4G17900 | PLATZ transcription factor family protein                         |
| AT2G05520 | GRP-3     | glycine-rich protein 3                                            |
| AT5G26340 | MSS1      | major facilitator superfamily protein                             |
| AT3G14990 | DJ1A      | Class I glutamine amidotransferase-like superfamily protein       |
| AT1G71030 | MYBL2     | MYB-like 2                                                        |
| AT3G53000 | PP2-A15   | phloem protein 2-A15                                              |
| AT4G40065 | AT4G40065 | other RNA                                                         |
| AT4G01026 | PYL7      | PYR1-like 7                                                       |
| AT2G46600 | AT2G46600 | calcium-binding EF-hand family protein                            |
| AT5G39050 | PMAT1     | HXXXD-type acyl-transferase family protein                        |
| AT1G12200 | FMO       | flavin-binding monooxygenase family protein                       |
| AT2G47890 | AT2G47890 | B-box type zinc finger protein with CCT domain-containing protein |

|           |           |                                                                     |
|-----------|-----------|---------------------------------------------------------------------|
| AT5G63790 | NAC102    | NAC domain containing protein 102                                   |
| AT3G44160 | P39       | outer membrane OMP85 family protein                                 |
| AT2G33550 | ASR3      | homeodomain-like superfamily protein                                |
| AT3G59210 | AT3G59210 | F-box/RNI-like superfamily protein                                  |
| AT4G11300 | DUF793    | protein of unknown function                                         |
| AT5G62350 | AT5G62350 | plant invertase/pectin methylesterase inhibitor superfamily protein |
| AT4G02050 | STP7      | sugar transporter protein 7                                         |
| AT5G45380 | DUR3      | urea-proton symporter DEGRADATION OF UREA 3                         |
| AT1G02300 | AtcathB1  | cysteine proteinases superfamily protein                            |
| AT1G76955 | AT1G76955 | expressed protein                                                   |
| AT5G20960 | AO1       | aldehyde oxidase 1                                                  |
| AT5G14940 | AT5G14940 | major facilitator superfamily protein                               |
| AT1G69850 | NRT1:2    | nitrate transporter 1:2                                             |
| AT2G16600 | ROC3      | rotamase CYP 3                                                      |
| AT5G28830 | AT5G28830 | calcium-binding EF hand family protein                              |
| AT3G26740 | CCL       | CCR-like protein                                                    |
| AT5G23240 | DJC76     | DNAJ heat shock N-terminal domain-containing protein                |
| AT5G24210 | AT5G24210 | alpha/beta-Hydrolases superfamily protein                           |
| AT2G45560 | CYP76C1   | cytochrome P450, family 76, subfamily C, polypeptide 1              |
| AT5G65310 | HB5       | homeobox protein 5                                                  |
| AT2G18170 | MPK7      | MAP kinase 7                                                        |
| AT5G26040 | HDA2      | histone deacetylase 2                                               |
| AT1G80920 | J8        | chaperone DnaJ-domain superfamily protein                           |
| AT5G59780 | MYB59     | myb domain protein 59                                               |
| AT4G25640 | DTX35     | detoxifying efflux carrier 35                                       |
| AT2G32800 | AP4.3A    | protein kinase family protein                                       |
| AT1G73650 | DUF1295   | protein of unknown function                                         |
| AT4G14716 | ARD1      | acireductone dioxygenase 1                                          |
| AT5G11580 | AT5G11580 | regulator of chromosome condensation (RCC1) family protein          |
| AT5G58200 | AT5G58200 | calcineurin-like metallo-phosphoesterase superfamily protein        |

**Table S5** A full list of genes that are down-regulated in CYP79A2 overexpression line ox-2, ref2-1, and ref5-1 (p-value < 0.05 for all genotypes).

| AGI Number | Name        | Short Description                                                           |
|------------|-------------|-----------------------------------------------------------------------------|
| AT1G01610  | GPAT4       | glycerol-3-phosphate acyltransferase 4                                      |
| AT1G02690  | IMPA-6      | importin alpha isoform 6                                                    |
| AT1G03440  | AT1G03440   | leucine-rich repeat (LRR) family protein                                    |
| AT1G11670  | AT1G11670   | MATE efflux family protein                                                  |
| AT1G24260  | SEP3        | K-box region and MADS-box transcription factor family protein               |
| AT1G25450  | KCS5        | 3-ketoacyl-CoA synthase 5                                                   |
| AT1G33811  | AT1G33811   | GDSL-like lipase/acylhydrolase superfamily protein                          |
| AT1G48480  | RKL1        | receptor-like kinase 1                                                      |
| AT1G53700  | WAG1        | PsPK3-type kinase                                                           |
| AT1G66250  | AT1G66250   | O-Glycosyl hydrolases family 17 protein                                     |
| AT1G69390  | MINE1       | homologue of bacterial MinE 1                                               |
| AT1G69770  | CMT3        | chromomethylase 3                                                           |
| AT1G72970  | HTH         | glucose-methanol-choline (GMC) oxidoreductase family protein                |
| AT1G77270  | AT1G77270   | hypothetical protein                                                        |
| AT2G19910  | AT2G19910   | RNA-dependent RNA polymerase family protein                                 |
| AT2G35190  | NPSN11      | putative plant snare 11                                                     |
| AT2G38110  | GPAT6       | glycerol-3-phosphate acyltransferase 6                                      |
| AT2G47440  | AT2G47440   | tetratricopeptide repeat (TPR)-like superfamily protein                     |
| AT3G01345  | AT3G01345   | Expressed protein                                                           |
| AT3G02380  | COL2        | CONSTANS-like 2                                                             |
| AT3G04290  | LTL1        | Li-tolerant lipase 1                                                        |
| AT3G11670  | DGD1        | UDP-Glycosyltransferase superfamily protein                                 |
| AT3G16150  | ASPG1       | N-terminal nucleophile aminohydrolases (Ntn hydrolases) superfamily protein |
| AT3G23670  | KINESIN-12B | phragmoplast-associated kinesin-related protein                             |
| AT3G23730  | XTH16       | xyloglucan endotransglucosylase/hydrolase 16                                |
| AT3G24500  | MBF1C       | multiprotein bridging factor 1C                                             |
| AT3G49900  | AT3G49900   | phototropic-responsive NPH3 family protein                                  |
| AT4G13260  | YUC2        | flavin-binding monooxygenase family protein                                 |
| AT4G17860  | DUF239      | protein of unknown function                                                 |
| AT4G18570  | AT4G18570   | tetratricopeptide repeat (TPR)-like superfamily protein                     |
| AT4G18960  | AG          | K-box region and MADS-box transcription factor family protein               |
| AT4G18970  | AT4G18970   | GDSL-like lipase/acylhydrolase superfamily protein                          |
| AT4G21760  | BGLU47      | beta-glucosidase 47                                                         |
| AT4G21770  | AT4G21770   | pseudouridine synthase family protein                                       |
| AT4G28230  | AT4G28230   | hypothetical protein                                                        |
| AT4G28680  | TYRDC       | L-tyrosine decarboxylase                                                    |

|           |           |                                                               |
|-----------|-----------|---------------------------------------------------------------|
| AT4G28780 | AT4G28780 | GDSL-like lipase/acylhydrolase superfamily protein            |
| AT4G31840 | ENODL15   | early nodulin-like protein 15                                 |
| AT4G32830 | AUR1      | ataurora1                                                     |
| AT5G02540 | AT5G02540 | NAD(P)-binding Rossmann-fold superfamily protein              |
| AT5G07180 | ERL2      | ERECTA-like 2                                                 |
| AT5G11160 | APT5      | adenine phosphoribosyltransferase 5                           |
| AT5G12050 | AT5G12050 | rho GTPase-activating protein                                 |
| AT5G13240 | MAF1      | transcription regulator                                       |
| AT5G18460 | DUF239    | protein of unknown function                                   |
| AT5G20270 | HHP1      | heptahelical transmembrane protein 1                          |
| AT5G25090 | ENODL13   | early nodulin-like protein 13                                 |
| AT5G37300 | WSD1      | O-acyltransferase (WSD1-like) family protein                  |
| AT5G38410 | RBCS3B    | ribulose biphosphate carboxylase (small chain) family protein |
| AT5G40460 | SMR6      | cyclin-dependent kinase inhibitor SMR3-like protein           |
| AT5G41080 | GDPD2     | PLC-like phosphodiesterases superfamily protein               |
| AT5G43500 | ARP9      | actin-related protein 9                                       |
| AT5G44635 | MCM6      | minichromosome maintenance (MCM2/3/5) family protein          |
| AT5G45670 | AT5G45670 | GDSL-like Lipase/Acylhydrolase superfamily protein            |
| AT5G47380 | DUF547    | protein of unknown function                                   |
| AT5G51750 | SBT1.3    | subtilase 1.3                                                 |
| AT5G53660 | GRF7      | growth-regulating factor 7                                    |
| AT5G59150 | RABA2D    | RAB GTPase homolog A2D                                        |
| AT5G64310 | AGP1      | arabinogalactan protein 1                                     |
| AT5G67460 | AT5G67460 | O-Glycosyl hydrolases family 17 protein                       |

**Table S6** GO term analysis of the genes that are up-regulated in CYP79A2 overexpression line ox-2, ref2, and ref5 compared to wild type.

| GO Term    | Description                                     | Count | Fold Enrichment | FDR        |
|------------|-------------------------------------------------|-------|-----------------|------------|
| GO:2000762 | regulation of phenylpropanoid metabolic process | 3     | 100.3562387     | 0.07125823 |
